# Supplementary material for: High-loaded sub-6 nm Pt1Co1 intermetallic compounds with highly efficient performance expression in PEMFCs
Source: Royal Society of Chemistry journal article supplement (doi:10.1039/d1ee02530a), 2021-11-12
Supplement: d1ee02530a1.pdf [file d1ee02530a1.pdf]

## High-loaded sub-6 nm Pt<sub>1</sub>Co<sub>1</sub> intermetallic compounds with high-efficient performance expression in PEMFCs

Qingqing Cheng<sup>a†</sup>, Shuai Yang<sup>b†</sup>, Cehuang Fu<sup>d</sup>, Liangliang Zou<sup>a\*</sup>, Zhiqing Zou<sup>a</sup>, Zheng Jiang<sup>b</sup>, Junliang Zhang<sup>d</sup> and Hui Yang<sup>a,c\*</sup>

<sup>a</sup> Dr. Q. Cheng, S. Yang, Dr. L. Zou, Dr. Z. Zou, Prof. Z. Jiang, Prof. H. Yang  
Shanghai Advanced Research Institute, Chinese Academy of Sciences, Shanghai 201210, P. R. China  
E-mail: yangh@sari.ac.cn; zoull@sari.ac.cn;

<sup>b</sup> S. Yang, Prof. Z. Jiang  
Shanghai Institute of Applied Physics, Chinese Academy of Sciences, Shanghai, 201204, China;

<sup>c</sup> Prof. H. Yang  
Ningbo Cotrun New Energy S&T Co., Ltd., Ningbo 315300 China;

<sup>d</sup> C. H. Fu, Prof. J. L. Zhang  
Institute of Fuel Cells  
Key Laboratory for Power Machinery and Engineering of MOE  
Shanghai Jiao Tong University  
800 Dongchuan Rd., Shanghai 200240, China

<sup>†</sup> Contributed equally to this work

### 1. Experimental section

#### 1.1. Synthesis of ultrafine Pt-NPs/C precursor

The carbon supported Pt-NPs was synthesized according to our previously reports. Specifically, the Pt carbonyl clusters were prepared by adding H<sub>2</sub>PtCl<sub>6</sub>·6H<sub>2</sub>O (purchased from Sigma-Aldrich), NaOH and CH<sub>3</sub>COONa (purchased from Sinopharm Chemical Reagent Co., Ltd.) with the mole ratio of 1: 4: 8 into 60 mL methanol solution kept at 55 °C for at least 8 h under a CO atmosphere. Thereafter, the pre-dispersed Vulcan XC-72R was quickly added into above solution under stirring for 8 h at 55 °C to control the Pt weight loading of 40 wt%. Then, the solvent was evaporated at 70 °C under N<sub>2</sub> purging and the obtained sample was slowly oxidized

at 0 °C for 2 days. Subsequently, the black precipitate was washed with DI-water for 3 times and dried in vacuum oven to obtain the Pt-NPs/C powder.

### **1.2. Fabrication of Co<sub>3</sub>O<sub>4</sub>/Pt-NPs/C precursor**

Co(NO<sub>3</sub>)<sub>2</sub>·6H<sub>2</sub>O (purchased from Sigma-Aldrich) and as-prepared Pt-NPs/C was dispersed into 50 mL DI-water with various Pt/Co mole ratio (3:1, 1:1 and 1:3) under ultrasonic for 2 h. Then, concentrated ammonia was added into above slurry to keep the pH around 9-10 and stirring for 12 h at 50 °C. After more times filtration, vacuum drying and grounding, the Co<sub>3</sub>O<sub>4</sub>/Pt-NPs/C precursor was achieved.

### **1.3. Preparation of Pt<sub>1</sub>Co<sub>1</sub>-IMC@Pt/C catalyst**

The as-prepared Co<sub>3</sub>O<sub>4</sub>/Pt-NPs/C precursor was subjected to heat-treatment under different temperature (T, T=500, 600, 700) for several hours (t, t=1, 2.5 and 4h) under 10% H<sub>2</sub>-90%Ar atmosphere with the heating rate of 7 °C min<sup>-1</sup>. After natural cooling to room temperature, the obtained powder was washed in warm 0.5 M H<sub>2</sub>SO<sub>4</sub> solution for 12 h to finally get the target samples, denoted as T-Pt<sub>1</sub>Co<sub>1</sub>-IMC@Pt/C-t.

## **2. Physical measurements**

Power X-ray diffraction (PXRD) were tested on Bruker AXS D8 ADVANCE powder X-ray diffractometer with a Cu K $\alpha$  ( $\lambda$  = 1.5418 Å) radiation source, operating at 40 kV and 40 mA. Diffraction patterns were collected at a scanning rate of 2°·min<sup>-1</sup> and with a step size of 0.02°. TEM images were obtained by FEI Tecnai 30F microscope at an accelerating voltage of 200 kV. High Angle Annular Dark Field Scanning Transmission Electron Microscopy (HAADF-STEM) and X-ray energy dispersive spectrometry (XEDS) mapping were performed on a Double Cs-corrector FEI Titan Themis G2 60–300 microscope. X-ray photoelectron spectroscopy (XPS) was conducted using a Quantum 2000 Scanning ESCA Microprobe instrument with a monochromatic Al K $\alpha$

source (1486.6 eV). The binding energy (BE) scale was calibrated according to the C 1s peak (284.8 eV). The elemental compositions were calculated from the peak area ratios after corrected for the sensitivity factor of each element. The N1s spectra were deconvoluted by using a commercially available data fitting program (XPSPEAK41 software). The X-ray absorption near-edge structure spectra were collected on BL14W1 beamline of Shanghai Synchrotron Radiation Facility (SSRF) and analyzed with software of Iffeffit Athena.

### **3. Electrochemical characterization**

Cyclic voltammetry (CV) and linear sweep voltammetry (LSV) were performed on rotating disk electrode (RDE, 5 mm diameter) which was polished by  $\text{Al}_2\text{O}_3$  power, cleaned in  $\text{H}_2\text{O}$ /ethanol solution and dried naturally. Then the 20  $\mu\text{L}$  of prepared catalyst slurry with concentration of 1  $\mu\text{g}/\mu\text{L}$  was dropped on the glass electrode (GC) to lead the catalyst loading of 15  $\mu\text{g}_{\text{Pt}}\text{cm}^{-2}$ . Electrochemical tests were conducted on the CHI 730E equipped with a three-electrode system, using GC coated with catalyst as working electrode, GC as counter electrode and  $\text{Hg}/\text{Hg}_2\text{SO}_4$  as reference electrode. All the LSV tests were conducted in 0.1 M  $\text{HClO}_4$  with a rotation speed of 1600 rpm at a scan rate of 10  $\text{mVs}^{-1}$ . Accelerated durability test (ADT) was conducted by cycling the catalyst with the potentials range from 0.6 V to 1.1 V at a scan rate of 100  $\text{mVs}^{-1}$  under continuous purging  $\text{O}_2$  in electrolyte.

### **4. Membrane assembly electrode (MEA) preparation and single fuel cell testing**

For the PEMFCs, 8  $\mu\text{m}$  Gore membrane was selected as the proton exchange membrane. The MEAs with a  $2.5 \times 2.5 \text{ cm}^2$  active area were fabricated by catalyst coating membrane (CCM) method. The catalyst inks were prepared by dispersing 40 wt% Pt/C (anode) and as-prepared Pt1Co1-IMC@Pt/C (cathode) with 25 wt.% Nafion in isopropanol/ $\text{H}_2\text{O}$  solution under ultrasonic for 3 h. The anode consisted of Pt/C with a metal loading of 0.1  $\text{mg cm}^{-2}$ . The cathode consisted of Pt1Co1-IMC@Pt/C catalysts with the Pt loading of 0.2  $\text{mg cm}^{-2}$ . The performance of PEMFCs were measured by polarization test on Arbin Fuel Cell Testing System (Arbin Instrument Inc., USA)

and the polarization data was recorded per 2 min. The as-prepared MEAs were activated and tested in a PEMFC testing setup by purging H<sub>2</sub> into the anode with the flow rate of 1 standard liter per minute (slpm) and O<sub>2</sub> or air into the cathode with flow rate of 0.4 slpm and 1.5 slpm. The testing temperature was controlled at 80 °C with 100 RH% and the back-pressure was fixed at 1 bar. The high-frequency resistance of MEA was recorded using battery resistance meter.

## 5. Density functional theory calculation

All calculations are performed by Density Functional Theory (DFT) on *Vienna Ab initio* Simulation Package (VASP). The ion-electron interaction and the exchange-correlation errors are described by projector augmented wave (PAW) method and Perdew-Burke-Ernzerhof (PBE) functional. the cutoff energy, residual energy and force are set as 500 eV, 10<sup>-6</sup> eV/atom and 0.02 eV/Å.

There are three kinds of 5-layer-slab models are used in our calculation to study the effect of Co, which consist of (111) facet and marked as pure-Pt, PtCo. Pure-Pt model contains 20 Pt atoms without strain effect. PtCo model is consist of PtCo core (1:1) and Pt skin according to the fact that Co atom would be etched after acid-washing and ORR process. The top two layers are relaxed. A vacuum slab of 15 Å and a Monkhorst-Pack grid of 7x7x1 are applied. It is well known that the content of Co-Co bond would increase when PtCo alloy become disordered. To understand the anti-oxidization of Co atoms in disordered and ordered PtCo alloys, the adsorption energies of O atom on two kinds of 4x4 slab models (Figure S16) are calculated with a Monkhorst-Pack grid of 4x4x1 as:

$$G_{O^*} = G_{ad} - G_{O_2} - G_{slab} - 2(G_{H^+} + G_{e^-}) + G_{H_2O}$$

Where  $G_{ad}$ ,  $G_{O_2}$ ,  $G_{slab}$ ,  $G_{H^+}$ ,  $G_{e^-}$ ,  $G_{H_2O}$  are free energies of slab with adsorbed O atom, clean slab, H<sup>+</sup>, e<sup>-</sup> and H<sub>2</sub>O.

The oxygen reduction reaction (ORR) is performed as a four-electron reaction in an acid environment:

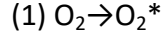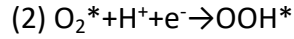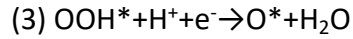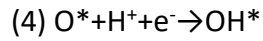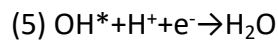

The free energy is given as:

$$G = E_{\text{DFT}} + \text{ZPE} - TS - neU$$

where  $E$  is the DFT energy,  $\text{ZPE}$  is the zero-point energy which is equal to  $\sum(h\nu_i/2)$  ( $h$  is the Planck constant and  $\nu_i$  is the vibrational frequency),  $T$  is the temperature (298.15 K),  $S$  is the entropy of the structure,  $n$  is the number of electrons transferred in elementary reaction,  $e$  is the charge constant and  $U$  is the potential.

The free energy of ( $\text{H}^+ + \text{e}^-$ ) is defined as half of that of  $\text{H}_2$  on the standard condition ( $U=0$ ,  $\text{pH}=0$ ).  $\text{H}_2$  and  $\text{H}_2\text{O}$  are calculated with DFT.  $G_{\text{H}_2\text{O}(l)} = G_{\text{H}_2\text{O}(g)} + RT \times \ln(P/P_0)$  is used to get the energy of  $\text{H}_2\text{O}$ , where  $R$  is gas constant,  $P_0=1$  bar and  $P=0.035$  bar. The energy of  $\text{O}_2$  is calculated according to the energy released (4.92 eV) in  $4\text{e}^-$  ORR process.

$\Delta G_i$  ( $i=1, 2, 3, 4, 5$ ) is calculated as the energy difference between elementary reaction. And the activity of catalyst models can be described by onset potential as:

$$U_{\text{onset}} = \max \Delta G_i / e$$

## Supplementary figures

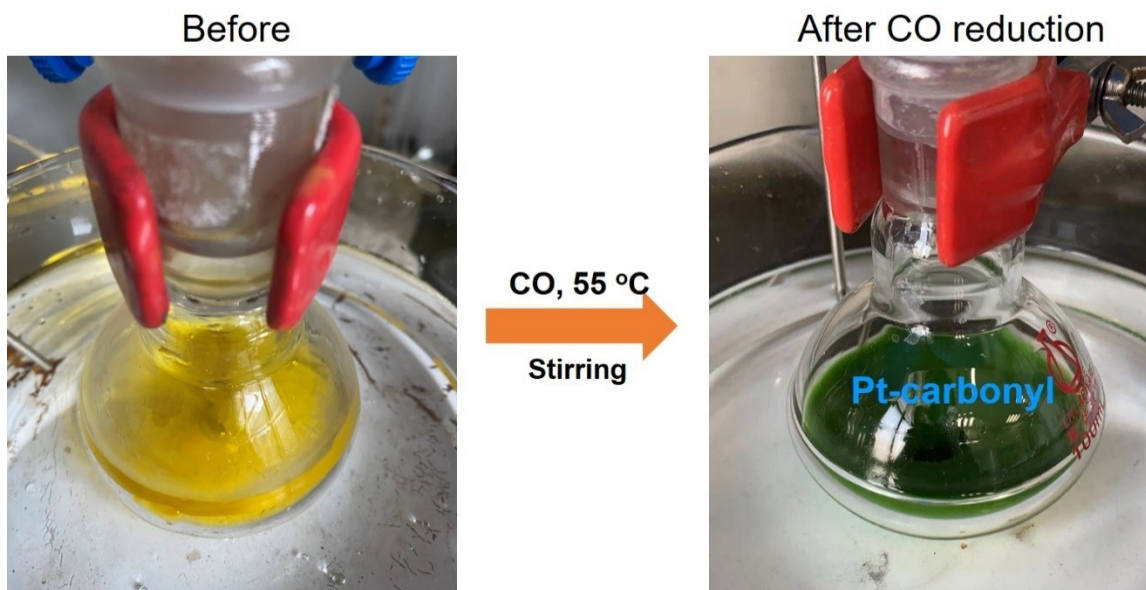

Figure S1. Photographs of preparation for Pt-carbonyl clusters

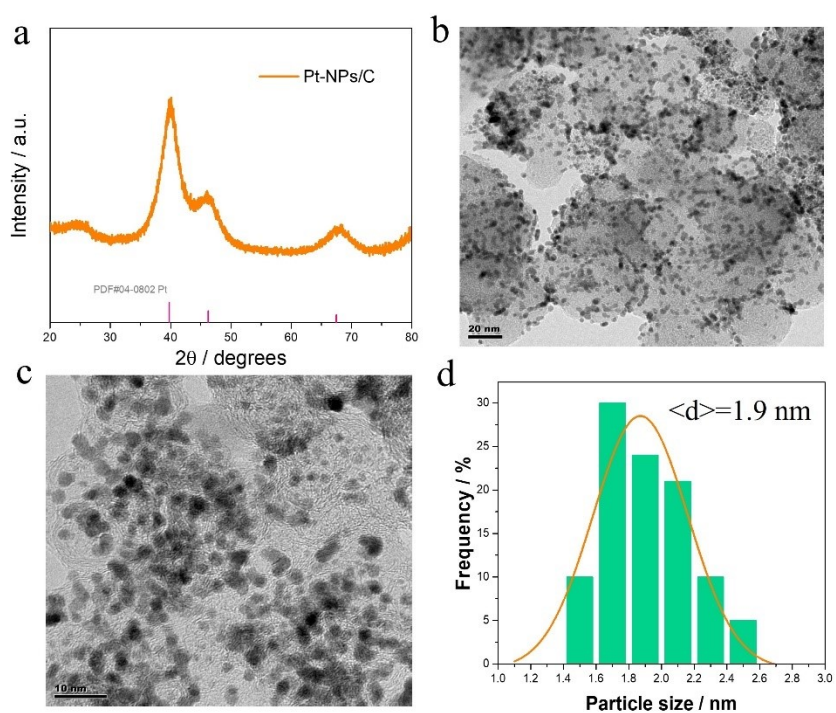

Figure S2. (a) XRD, (b) TEM (c) high-magnified TEM (d) size distribution histogram of as-prepared Pt-NPs/C precursor.

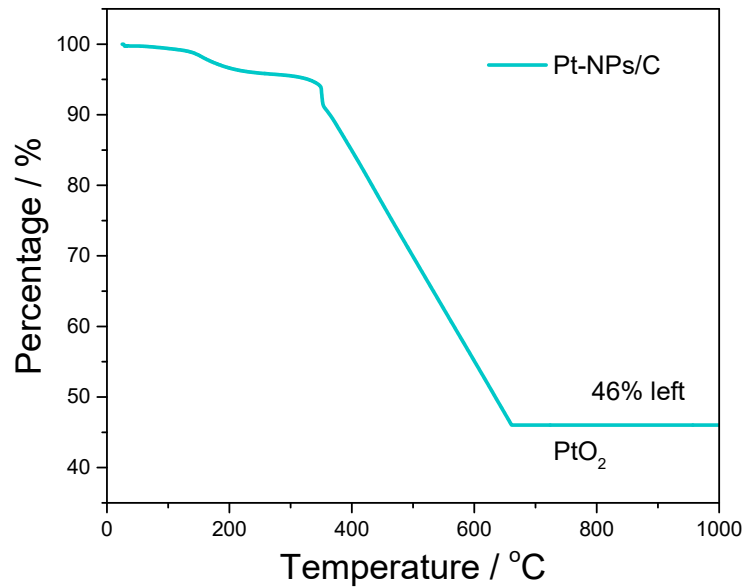

Figure S3. TG curve of Pt-NPs/C under O<sub>2</sub> atmosphere.

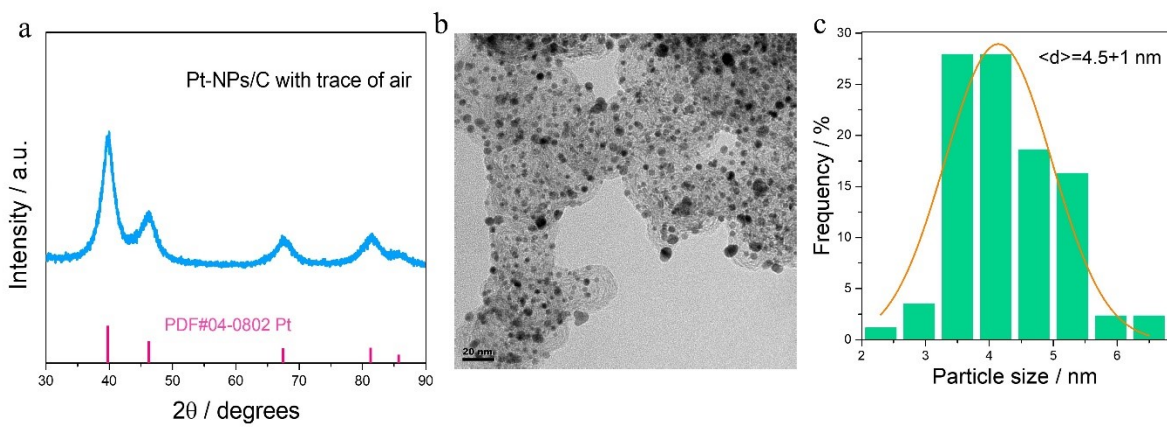

Figure S4. (a) XRD pattern (b) TEM image and (c) size distribution histogram of Pt-NPs/C precursor prepared with trace of air.

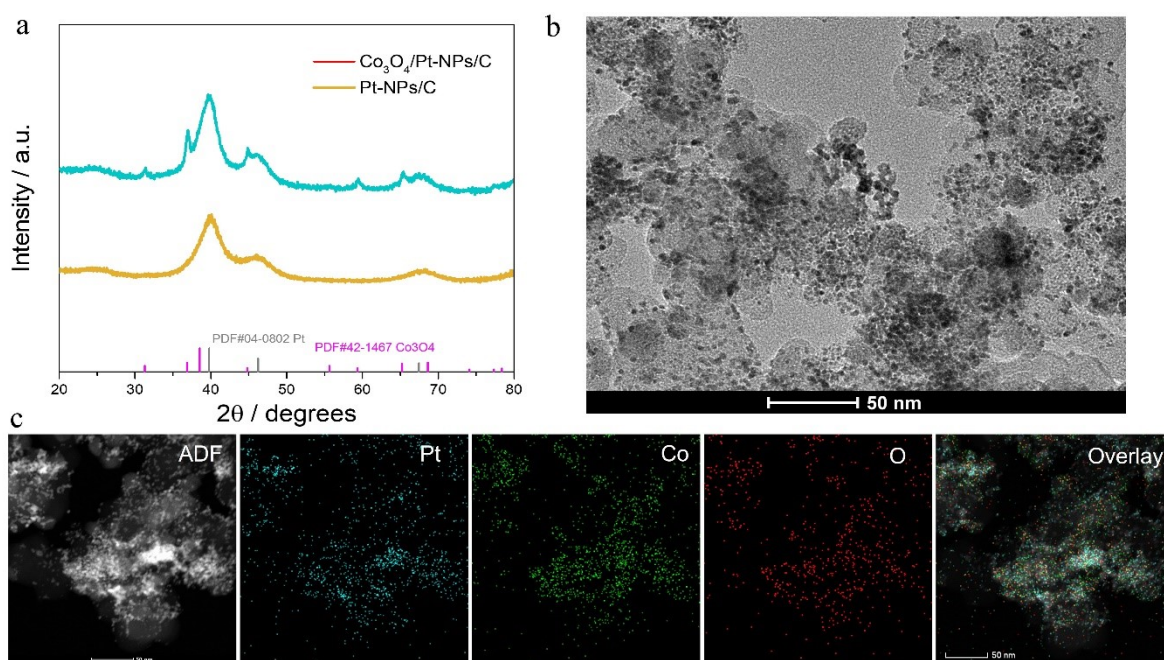

Figure S5. (a) XRD pattern (b) TEM image (c) EDS-mapping of  $\text{Co}_3\text{O}_4/\text{Pt-NPs/C}$  precursor.

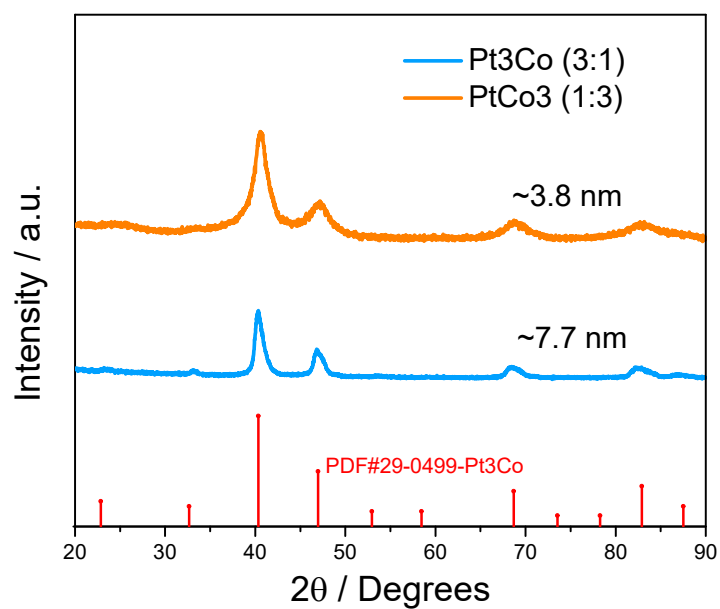

Figure S6. XRD patterns of PtCo/C catalyst prepared with different Pt/Co feeding ratio at 700 °C for 2.5 h.

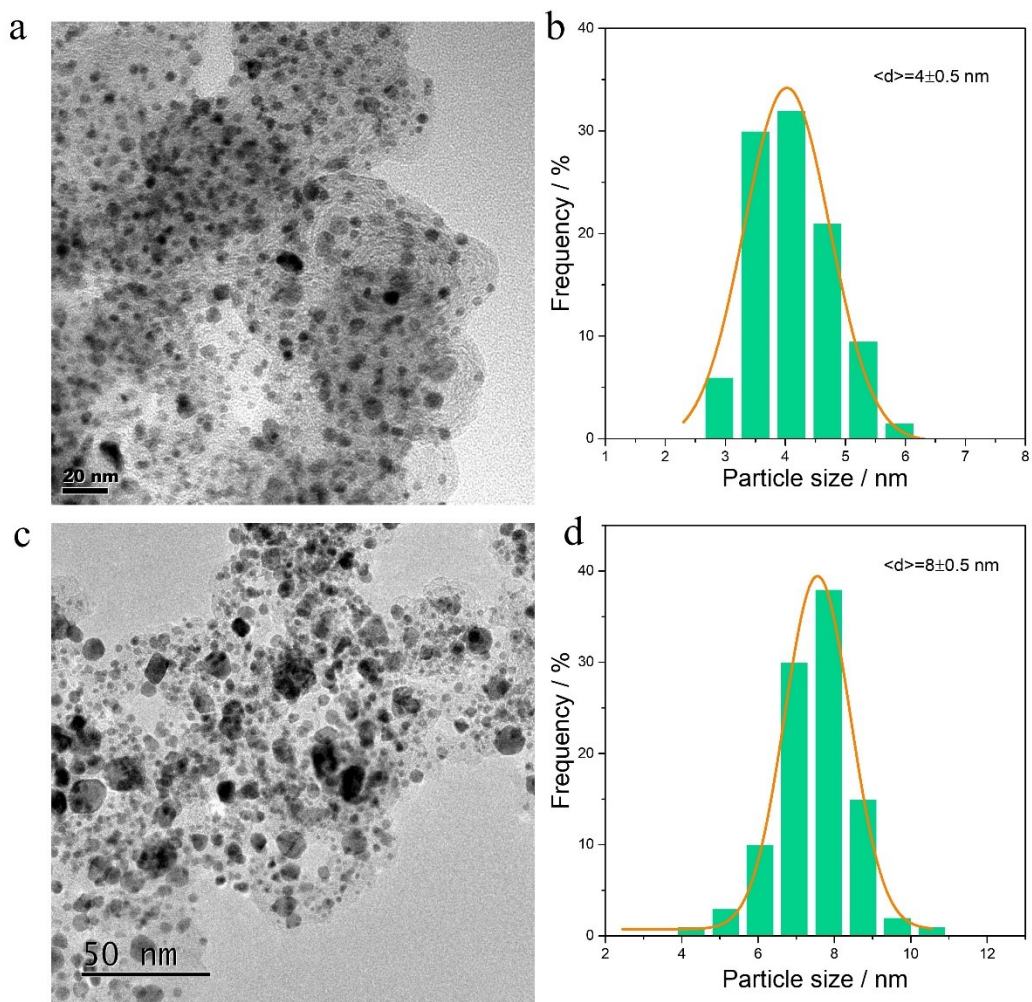

Figure S7. TEM images and size distribution histogram for (a, b) PtCo/C (1:3) and (c, d) PtCo/C (3:1) contrast catalysts.

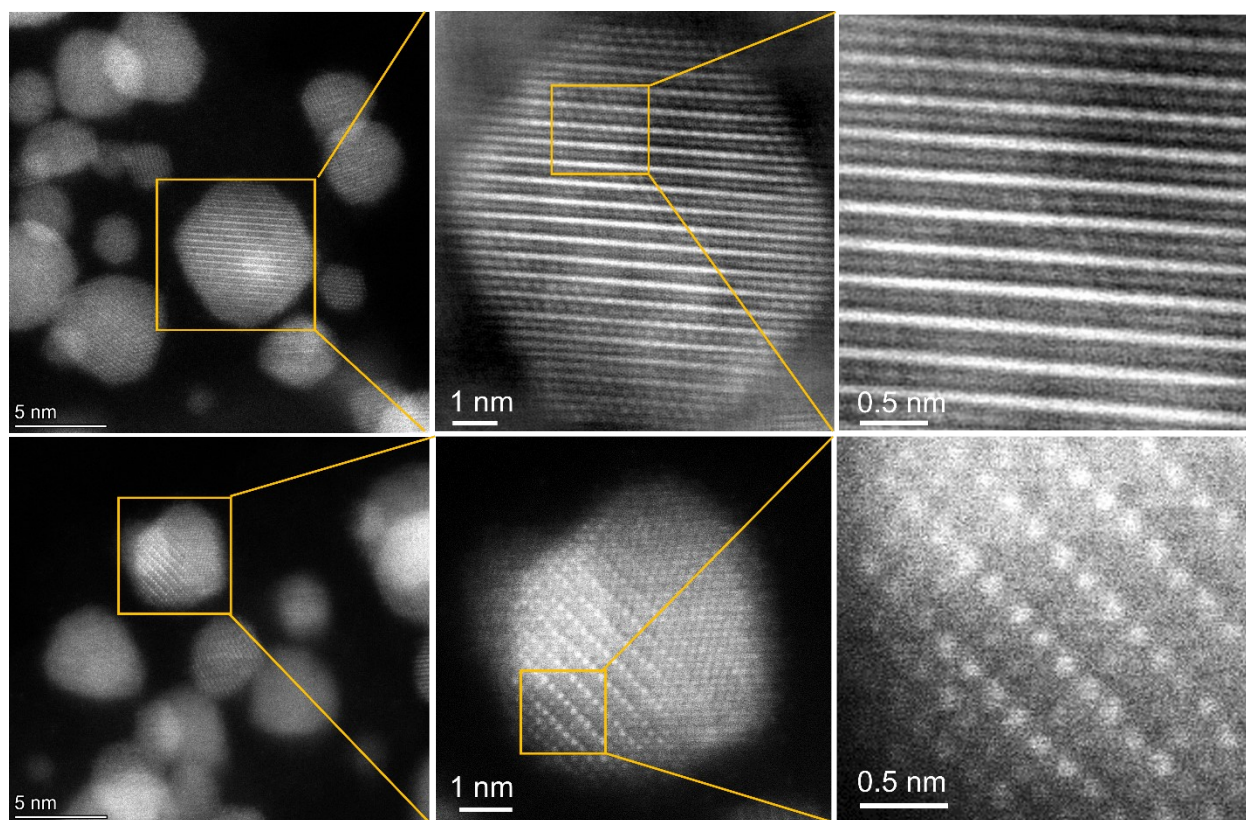

Figure S8. Atomic resolution STEM images for as-prepared 700-Pt1Co1-IMC@Pt/C-2.5 catalyst at different locations.

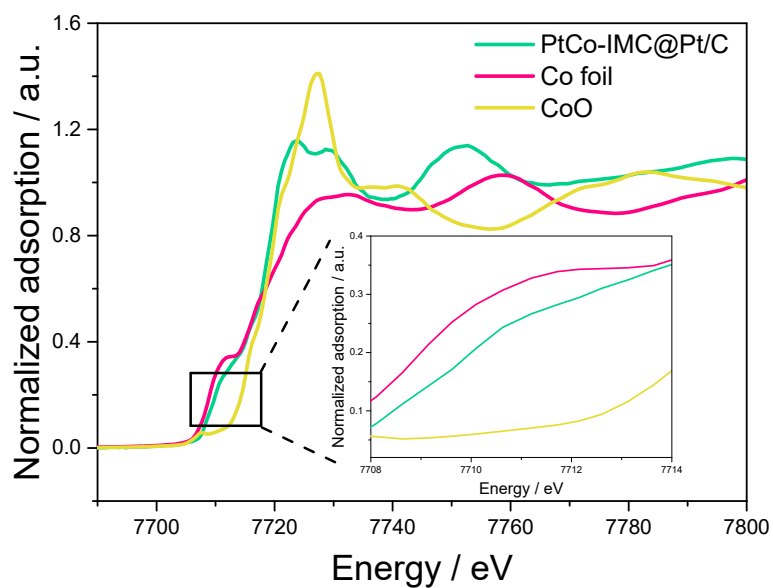

Figure S9. Co K-edge XANES spectra for the Pt1Co1-IMC@Pt, Co foil and CoO samples

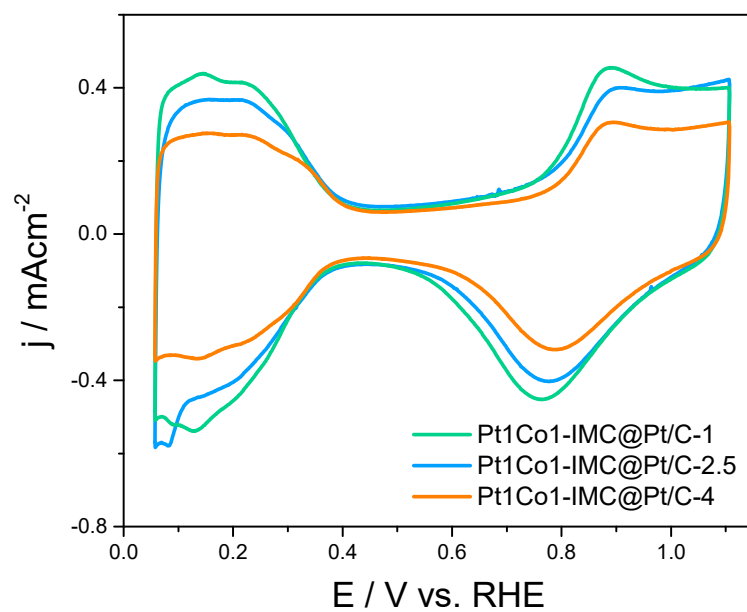

Figure S10. CV curves on Pt1Co1-IMC/C catalysts prepared for various annealing times in N<sub>2</sub>-saturated 0.1 M HClO<sub>4</sub> solution with scan rate of 50 mVs<sup>-1</sup>.

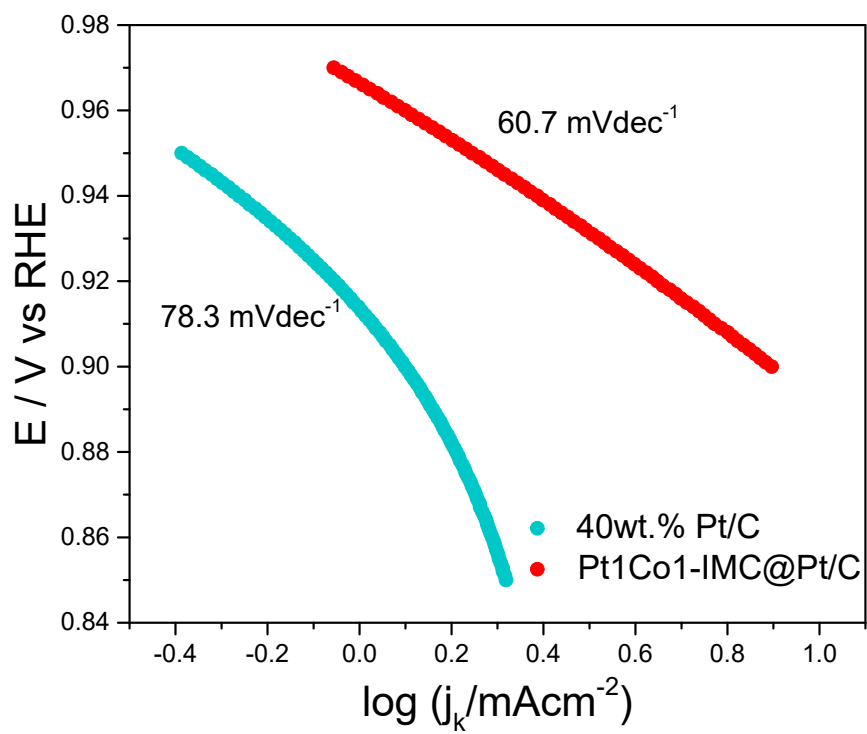

Figure S11. Tafel plots for Pt1Co1-IMC@Pt/C and commercial Pt/C catalysts

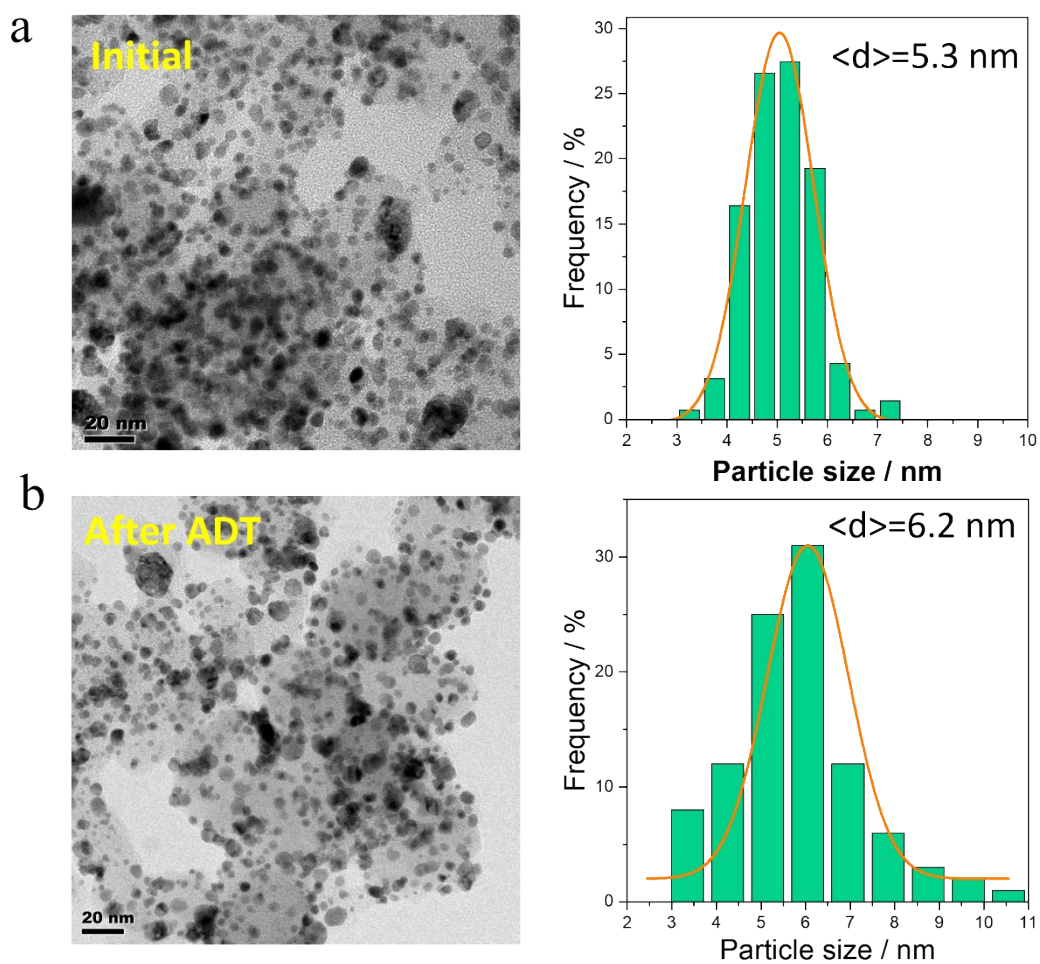

Figure S12. TEM images and corresponding size distribution of Pt1Co1-IMC@Pt/C (a) before and (b) after ADT.

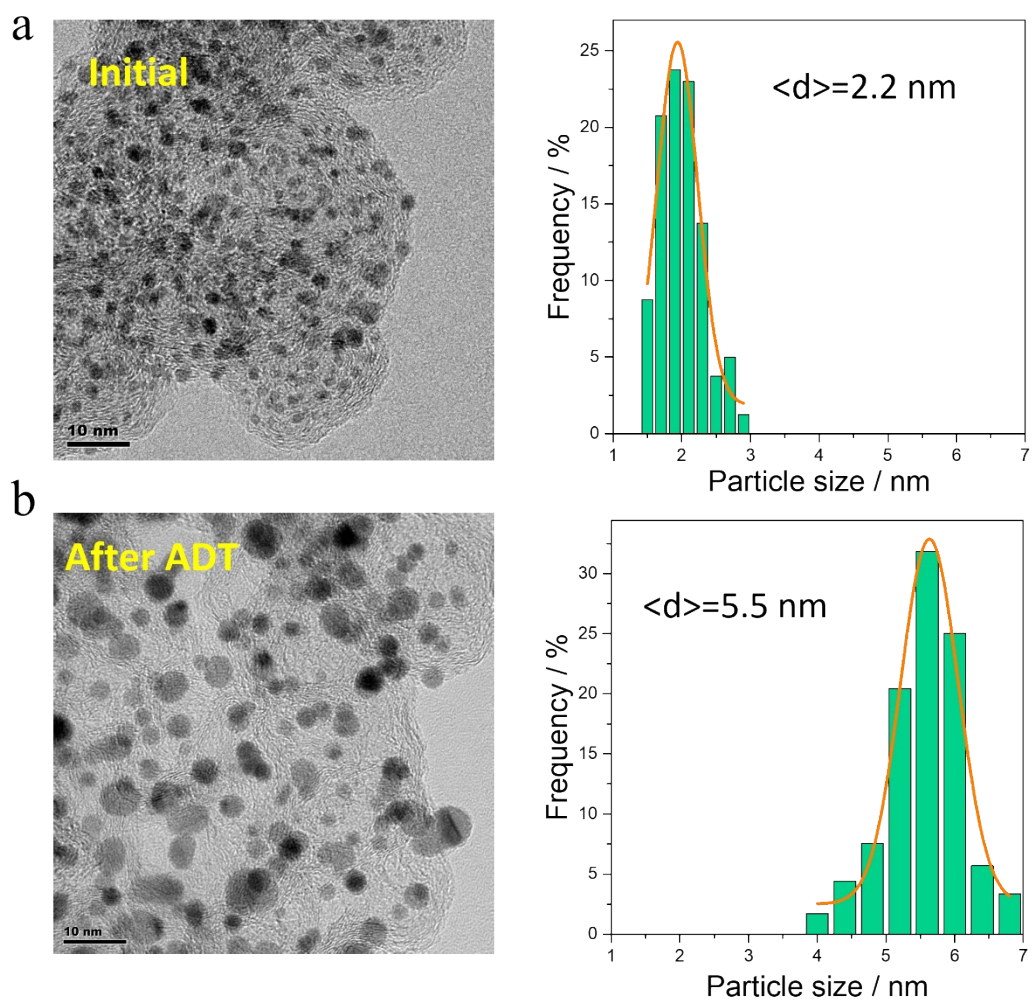

Figure S13. TEM images and corresponding size distribution of commercial Pt/C (a) before and (b) after ADT.

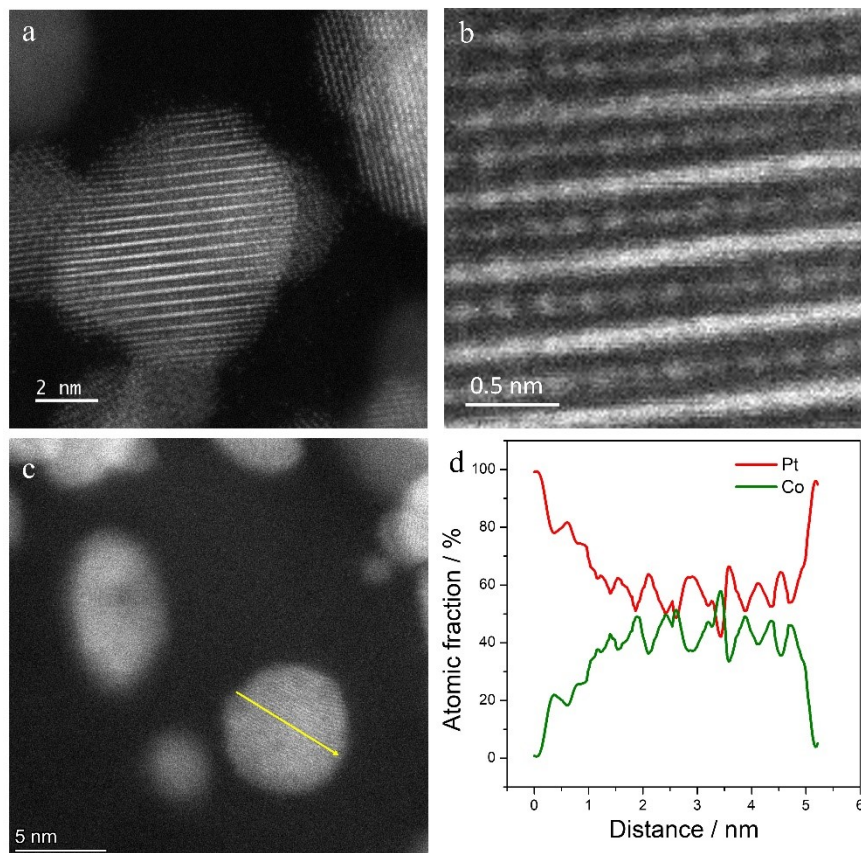

Figure S14. (a, b) STEM images (c, d) EDS line-profile for Pt1Co1-IMC@Pt/C catalyst after ADT

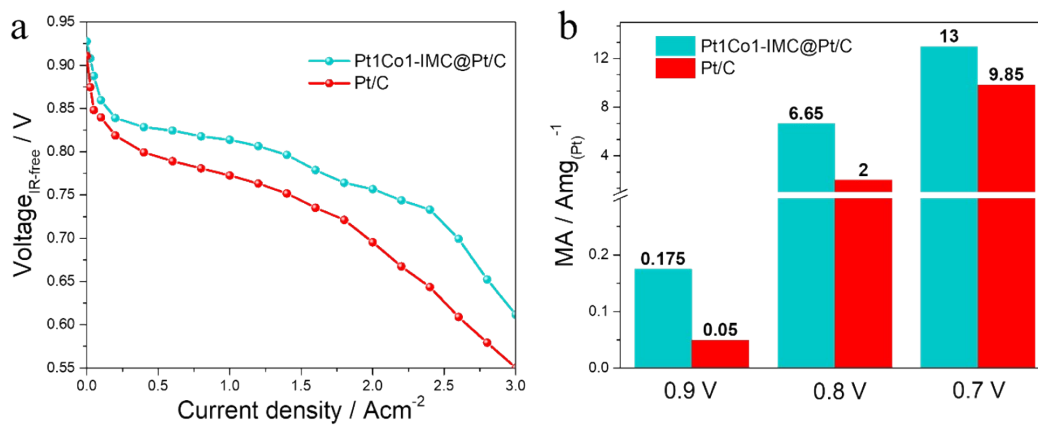

Figure S15. (a) H<sub>2</sub>-Air polarization curves corrected by high-frequency resistance; (b) Mass activities for Pt1Co1-IMC@Pt/C and commercial Pt/C at various voltages.

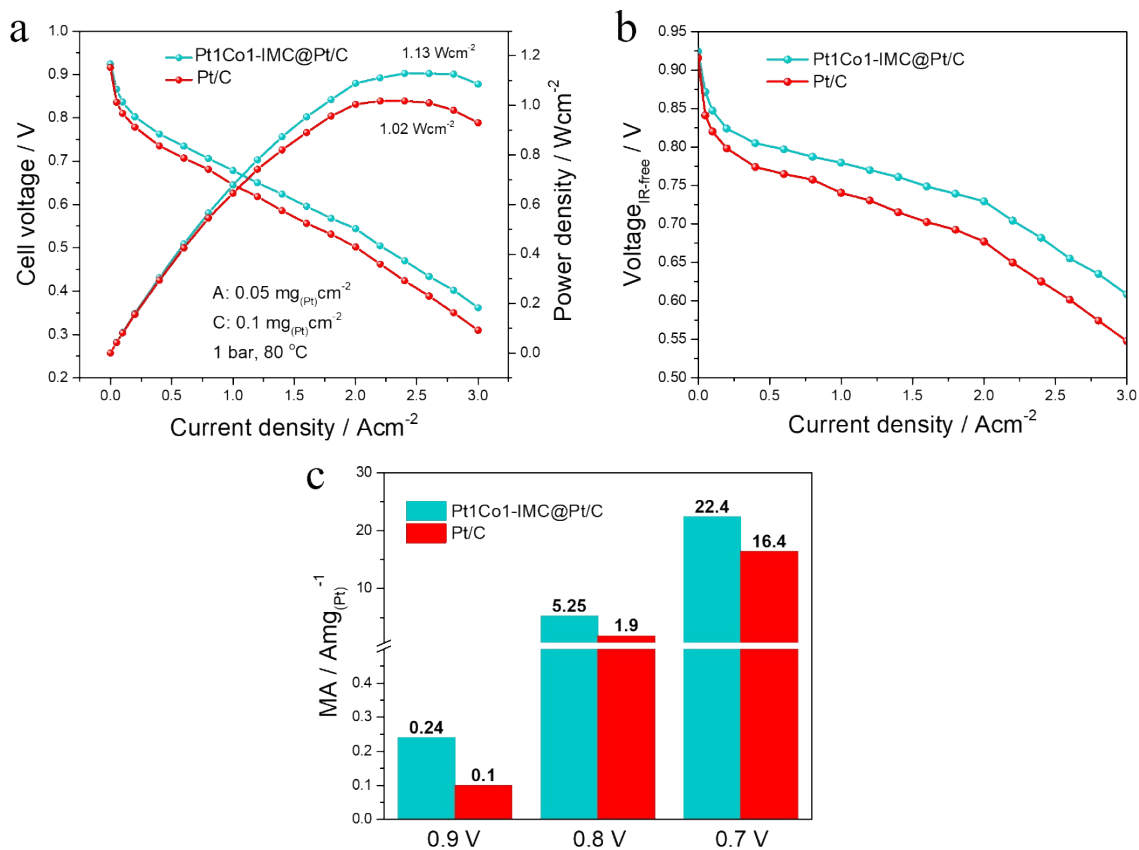

Figure S16. (a) Steady-state polarization curves of MEAs prepared by using Pt1Co1-IMC@Pt/C and commercial 40 wt.% Pt/C as cathode catalysts with low Pt usage. (A: 0.05 mg<sub>(Pt)</sub>cm<sup>-2</sup>, C: 0.1 mg<sub>(Pt)</sub>cm<sup>-2</sup>) under H<sub>2</sub>-air condition; (b) IR-free polarization curves and (c) corresponding MAs at various voltages.

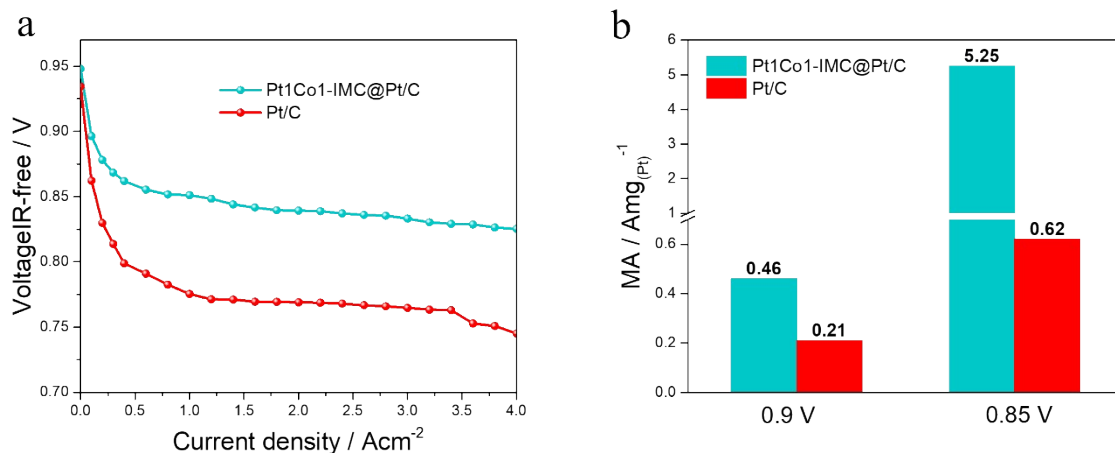

Figure S17. (a) comparison of IR-free polarization curves for Pt1Co1-IMC@Pt/C and Pt/C catalysts under H<sub>2</sub>-O<sub>2</sub> condition; (c) Mass activities for Pt1Co1-IMC@Pt and commercial Pt/C at 0.9 V and 0.85 V, respectively.

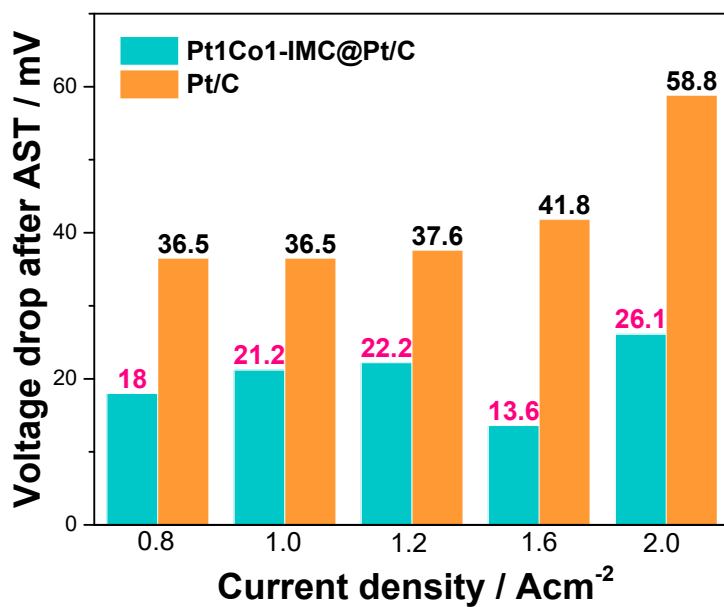

Figure S18. Voltage drops for Pt1Co1-IMC@Pt/C and Pt/C after AST at various current densities.

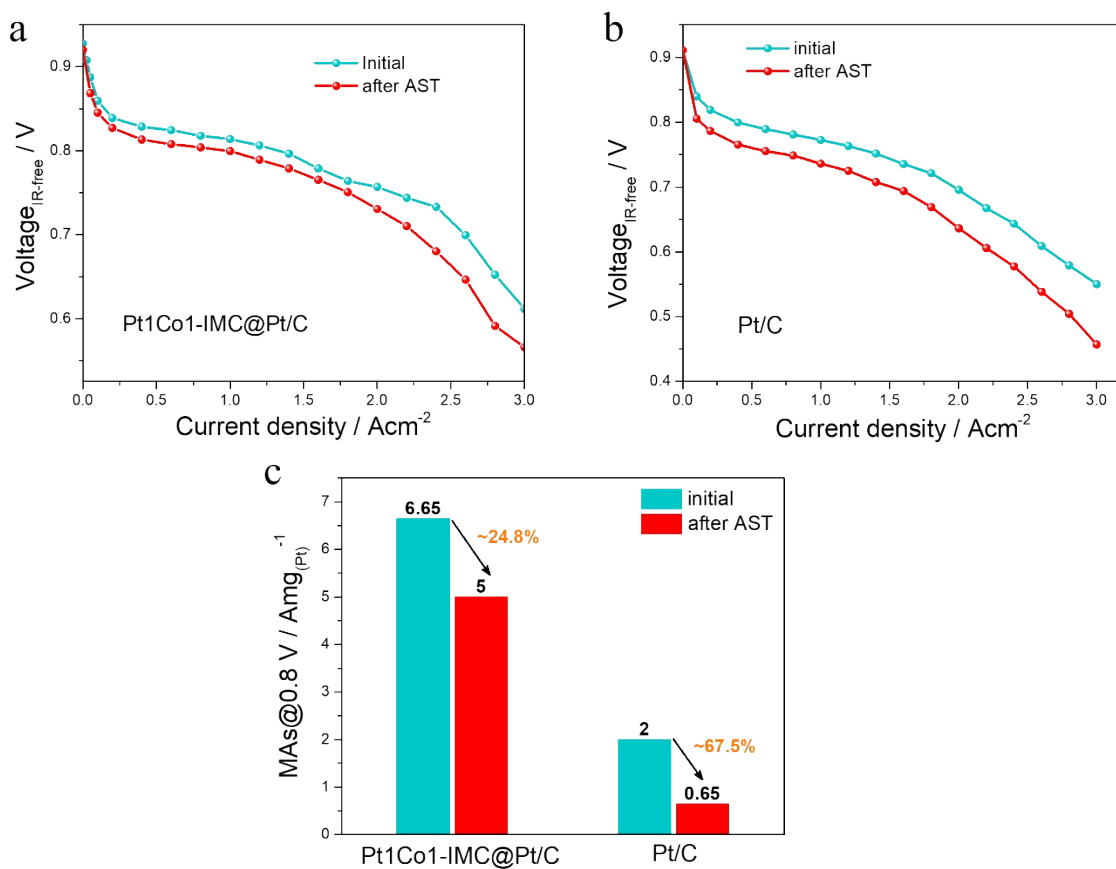

Figure S19. (a, b) HFR-corrected I-V curves for Pt1Co1-IMC@Pt/C and commercial Pt/C before and after AST (c) corresponding MA degradation comparison at voltage of 0.8 V<sub>(IR-free)</sub>.

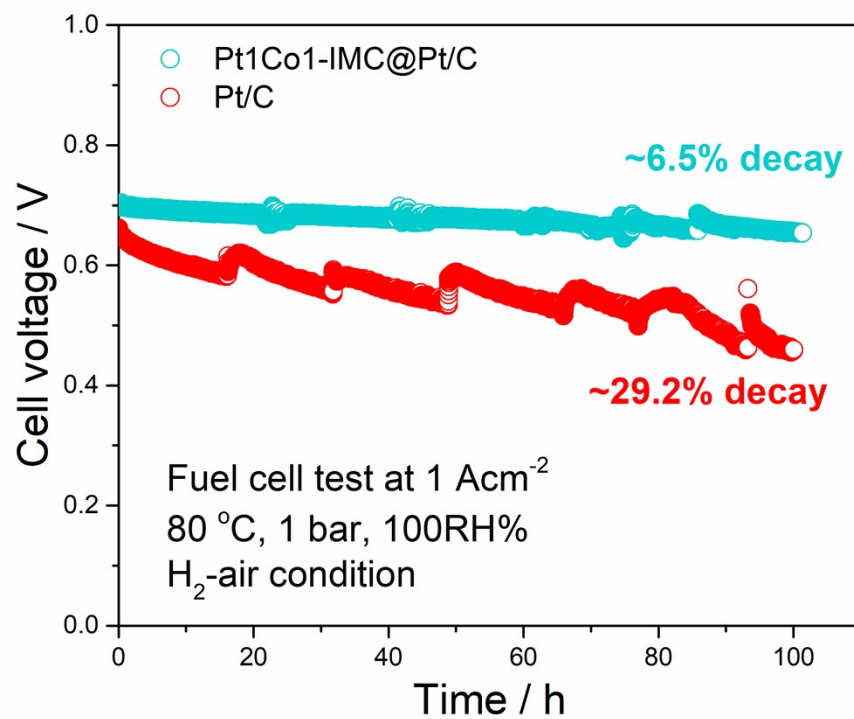

Figure S20. Long-term stability test for H<sub>2</sub>-air integrated with Pt1Co1-IMC@Pt/C and commercial catalyst Pt/C catalysts at a constant current density of 1 Acm<sup>-2</sup>.

**Table S1.** ICP results for various samples.

| Sample           | Mass / mg | Volume / mL | Pt / mgL <sup>-1</sup> | Co / mgL <sup>-1</sup> | Atom ratio (Pt : Co) |
|------------------|-----------|-------------|------------------------|------------------------|----------------------|
| Pt-NPs/C         | 14        | 500         | 11.45                  |                        |                      |
| Pt1Co1-IMC/C-1   | 14        | 500         | 10.60                  | 1.59                   | 67:33                |
| Pt1Co1-IMC/C-2.5 | 13        | 500         | 9.53                   | 2.11                   | 57:43                |
| Pt1Co1-IMC/C-4   | 10        | 500         | 6.44                   | 1.68                   | 53:47                |

**Table S2.** The fitting parameters of Pt L-edge and Co K-edge for various samples

| Sample  | Shell  | N <sup>[a]</sup> | R <sup>[b]</sup> (Å) | $\Delta E_0$ <sup>[c]</sup> (eV) | $\sigma^2$ <sup>[d]</sup> (10 <sup>-3</sup> Å <sup>2</sup> ) | R-factor |
|---------|--------|------------------|----------------------|----------------------------------|--------------------------------------------------------------|----------|
| Pt-foil | Pt-Pt  | 12               | 2.76±0.00            | 7.3±0.4                          | 4.6±0.2                                                      | 0.002    |
| Co-foil | Co-Co  | 12               | 2.49±0.00            | 7.4±0.4                          | 6.2±0.2                                                      | 0.001    |
| Pt/Co   | Pt-Co  | 4.7              | 2.64 ± 0.01          | 5.2 ± 1.2                        | 6.9 ± 0.1                                                    | 0.003    |
|         | Pt-Pt  | 5.8              | 2.69 ± 0.01          | 2.1 ± 1.2                        | 5.4 ± 0.1                                                    |          |
|         | Co-O/N | 1.0              | 2.10 ± 0.04          | 10.0 ± 0.0                       | 10                                                           |          |
| Co/Pt   | Co-Co  | 3.2              | 2.61±0.01            | -6.7±2.8                         | 8.1±2.0                                                      | 0.009    |
|         | Co-Pt  | 4.0              | 2.65±0.01            | -3.8±2.1                         | 5.0±1.4                                                      |          |

[a] coordination numbers; [b] the internal atomic distance; [c] the edge-energy shift. [d] Debye-Waller factor;

**Table S3.** The performance of H<sub>2</sub>-air PEMFCs with advanced Pt-based catalysts as cathode.

| Sample              | Test condition                                                                    | Peak power density /<br>mWcm <sup>-2</sup> | Current<br>density@0.65V /<br>Acm <sup>-2</sup> | Reference |
|---------------------|-----------------------------------------------------------------------------------|--------------------------------------------|-------------------------------------------------|-----------|
| Pt1Co1-IMC@Pt/C     | Cathode: 0.2 mgcm <sup>-2</sup> ,<br>BP <sup>[a]</sup> : 100kPa, 80 °C,<br>100%RH | 1.23                                       | 1.45                                            | This work |
| Pt1Co1-IMC@Pt/C     | Cathode: 0.1 mgcm <sup>-2</sup> ,<br>BP: 100kPa, 80 °C,<br>100%RH                 | 1.13                                       | 1.20                                            | This work |
| P-Pt/C              | Cathode: 0.15 mgcm <sup>-2</sup> ,<br>BP: 50kPa, 80 °C,<br>100%RH                 | 1.06                                       | ~1.20                                           | 1         |
| Coplanar Pt/C       | Cathode: 0.1 mgcm <sup>-2</sup> ,<br>BP: 150kPa, 80 °C,<br>100%RH                 | 0.553                                      | ~0.71                                           | 2         |
| Fine grain PtFe/C   | 0.225 mgcm <sup>-2</sup> , BP:<br>150kPa, 80 °C,<br>100%RH                        | ~0.59                                      | 0.62                                            | 3         |
| L10-FePt/Pt         | 0.101 mgcm <sup>-2</sup> , BP:<br>150kPa, 80 °C,<br>100%RH                        | ~0.6                                       | ~0.82                                           | 4         |
| Pt/40Co-NC-900      | 0.13 mgcm <sup>-2</sup> , BP:<br>150kPa, 80 °C,<br>100%RH                         | ~0.7                                       | ~1.01                                           | 5         |
| PtCo/NGC            | Cathode: 0.1 mgcm <sup>-2</sup> ,<br>BP: 170kPa, 80 °C,<br>60%RH                  | 0.697                                      | ~0.75                                           | 6         |
| LP@PF-2             | Cathode: 0.035<br>mgcm <sup>-2</sup> , BP: 100kPa,<br>80 °C, 100%RH               | ~0.8                                       | ~0.81                                           | 7         |
| PtNi alloy nanocage | Cathode: 0.15 mgcm <sup>-2</sup> ,<br>BP: 200kPa, 80 °C,<br>100%RH                | 0.92                                       | ~1.30                                           | 8         |
| Dealloyed PtNi      | Cathode: 0.1 mgcm <sup>-2</sup> ,<br>BP: 150kPa, 80 °C,<br>100%RH                 | ~0.9                                       | ~1.20                                           | 9         |
| Pt67Co31W2          | Cathode: 0.11 mgcm <sup>-2</sup> ,<br>BP: 150kPa, 80 °C,<br>100%RH                | ~0.6                                       | ~0.81                                           | 10        |
| Dealloyed PtNi/C    | Cathode: 0.1 mgcm <sup>-2</sup> ,<br>BP: 100kPa, 80 °C,<br>100%RH                 | ~0.82                                      | 1.10                                            | 11        |
| Ga-PtNi/C           | Cathode: 0.15 mgcm <sup>-2</sup> ,<br>BP: 1atom, 65 °C,<br>100%RH                 | ~0.42                                      | ~0.45                                           | 12        |

[a] BP: back pressure

**Table S4.** High-frequency resistance (HFR) values of the MEA at various current densities in H<sub>2</sub>-air fuel cell

| Current density /<br>mAcm <sup>-2</sup> | HFR for Pt1Co1-<br>IMC@Pt/C / mΩcm <sup>2</sup> | HFR for PtC / mΩcm <sup>2</sup> |
|-----------------------------------------|-------------------------------------------------|---------------------------------|
| 0.05                                    | 111.25                                          | 104.375                         |
| 0.1                                     | 110                                             | 102.5                           |
| 0.2                                     | 108.75                                          | 101.25                          |
| 0.4                                     | 106.25                                          | 98.75                           |
| 0.6                                     | 104.375                                         | 97.5                            |
| 0.8                                     | 101.875                                         | 96.875                          |
| 1                                       | 101.25                                          | 95.625                          |
| 1.2                                     | 100                                             | 95                              |
| 1.4                                     | 98.125                                          | 93.75                           |
| 1.6                                     | 95.625                                          | 92.5                            |
| 1.8                                     | 95                                              | 91.25                           |
| 2                                       | 92.5                                            | 89.375                          |
| 2.2                                     | 90.625                                          | 87.5                            |
| 2.4                                     | 88.125                                          | 85                              |
| 2.6                                     | 85                                              | 83.75                           |
| 2.8                                     | 80.625                                          | 81.875                          |
| 3                                       | 77.5                                            | 80                              |

**Table S5.** High-frequency resistance (HFR) values of the MEA at various current densities in H<sub>2</sub>-O<sub>2</sub> fuel cell.

| Current density /<br>mAcm <sup>-2</sup> | HFR for Pt1Co1-<br>IMC@Pt/C / mΩcm <sup>2</sup> | HFR for PtC/ mΩcm <sup>2</sup> |
|-----------------------------------------|-------------------------------------------------|--------------------------------|
| 0.1                                     | 87.5                                            | 85.625                         |
| 0.2                                     | 86.25                                           | 85                             |
| 0.3                                     | 85.625                                          | 85.625                         |
| 0.4                                     | 85                                              | 83.75                          |
| 0.6                                     | 83.75                                           | 82.5                           |
| 0.8                                     | 83.125                                          | 83.125                         |
| 1.0                                     | 83.75                                           | 81.25                          |
| 1.2                                     | 81.875                                          | 79.375                         |
| 1.4                                     | 79.375                                          | 79.375                         |
| 1.6                                     | 78.125                                          | 76.875                         |
| 1.8                                     | 76.875                                          | 75.625                         |
| 2.0                                     | 76.875                                          | 75                             |
| 2.2                                     | 76.25                                           | 76.25                          |
| 2.4                                     | 75                                              | 73.75                          |
| 2.6                                     | 73.125                                          | 73.75                          |
| 2.8                                     | 70.625                                          | 71.875                         |
| 3.0                                     | 68.75                                           | 70                             |
| 3.2                                     | 67.5                                            | 68.75                          |
| 3.4                                     | 66.875                                          | 68.125                         |
| 3.6                                     | 66.25                                           | 62.5                           |
| 3.8                                     | 64.375                                          | 60.625                         |
| 4.0                                     | 62.5                                            | 59.375                         |

## References

1. B.-A. Lu, L.-F. Shen, J. Liu, Q. Zhang, L.-Y. Wan, D. J. Morris, R.-X. Wang, Z.-Y. Zhou, G. Li, T. Sheng, L. Gu, P. Zhang, N. Tian and S.-G. Sun, *ACS Catal.*, 2020, **11**, 355-363.
2. Y. Hu, M. Zhu, X. Luo, G. Wu, T. Chao, Y. Qu, F. Zhou, R. Sun, X. Han, H. Li, B. Jiang, Y. Wu and X. Hong, *Angew. Chem. Int. Ed.*, 2021, **60**, 6533-6538.
3. X. X. Du, Y. He, X. X. Wang and J. N. Wang, *Energy Environ. Sci.*, 2016, **9**, 2623-2632.
4. J. Li, Z. Xi, Y. T. Pan, J. S. Spendelow, P. N. Duchesne, D. Su, Q. Li, C. Yu, Z. Yin, B. Shen, Y. S. Kim, P. Zhang and S. Sun, *J. Am. Chem. Soc.*, 2018, **140**, 2926-2932.

5. X. X. Wang, S. Hwang, Y. T. Pan, K. Chen, Y. He, S. Karakalos, H. Zhang, J. S. Spendelow, D. Su and G. Wu, *Nano Lett.*, 2018, **18**, 4163-4171.
6. W. S. Jung, W. H. Lee, H.-S. Oh and B. N. Popov, *J. Mater. Chem. A*, 2020, **8**, 19833-19842.
7. L. Chong, J. Wen, J. Kubal, F. G. Sen, J. Zou, J. Greeley, M. Chan, H. Barkholtz, W. Ding and D.-J. Liu, *Science*, 2018, **362**, 1276-1281.
8. X. Tian, X. Zhao, Y.-Q. Su, L. Wang, H. Wang, D. Dang, B. Chi, H. Liu, E. J. Hensen and X. W. D. Lou, *Science*, 2019, **366**, 850-856.
9. B. Han, C. E. Carlton, A. Kongkanand, R. S. Kukreja, B. R. Theobald, L. Gan, R. O'Malley, P. Strasser, F. T. Wagner and Y. Shao-Horn, *Energy Environ. Sci.*, 2015, **8**, 258-266.
10. J. Liang, N. Li, Z. Zhao, L. Ma, X. Wang, S. Li, X. Liu, T. Wang, Y. Du, G. Lu, J. Han, Y. Huang, D. Su and Q. Li, *Angew. Chem. Int. Ed.*, 2019, **58**, 15471-15477.
11. F. Dionigi, C. C. Weber, M. Primbs, M. Gocyla, A. M. Bonastre, C. Spori, H. Schmies, E. Hornberger, S. Kuhl, J. Drnec, M. Heggen, J. Sharman, R. E. Dunin-Borkowski and P. Strasser, *Nano Lett.*, 2019, **19**, 6876-6885.
12. J. Lim, H. Shin, M. Kim, H. Lee, K. S. Lee, Y. Kwon, D. Song, S. Oh, H. Kim and E. Cho, *Nano Lett.*, 2018, **18**, 2450-2458.
